# Supplementary material
Source: publisher figshare collection journal article supplement (https://acs.figshare.com/ndownloader/files/6035478)
Supplement: Supplementary file 1 [file 6035478]

## Supporting Information for:

### Crystallographic Investigations into Properties of Acentric Hybrid Perovskite Single Crystals $\text{NH}(\text{CH}_3)_3\text{SnX}_3$ (X= Cl, Br)

Yangyang Dang,<sup>†</sup> Cheng Zhong,<sup>‡</sup> Guodong Zhang,<sup>†</sup> Dianxing Ju,<sup>†</sup> Lei Wang,<sup>†</sup> Shengqing Xia,<sup>†</sup> Haibing Xia<sup>†</sup> and Xutang Tao<sup>\*†</sup>

<sup>†</sup>State Key Laboratory of Crystal Materials, Shandong University, No. 27 Shanda South Road, Jinan, 250100, P. R. China.

<sup>‡</sup>Solar and Photovoltaic Engineering Research Center (SPERC), King Abdullah University of Science and Technology (KAUST), 23955-6900 Thuwal, Saudi Arabia.

\*E-mail: txt@sdu.edu.cn.

#### Experimental Section

**Figure S1.** Schematic illustrations for the growth equipment of bulk  $\text{NH}(\text{CH}_3)_3\text{SnX}_3$  (X= Cl, Br) single crystals.

**Figure S2.** The photos of opaque  $\text{NH}(\text{CH}_3)_3\text{SnX}_3$  (X=Cl, Br) single crystals.

**Figure S3.** (a) The powder SHG signal of  $\text{NH}(\text{CH}_3)_3\text{SnX}_3$  (X= Cl, Br) compared with  $\text{KH}_2\text{PO}_4$  (KDP) (particle size: 75-100  $\mu\text{m}$ ). (b) Particle size dependence of SHG intensity for  $\text{NH}(\text{CH}_3)_3\text{SnX}_3$  (X= Cl, Br).

**Figure S4.** Temperature dependence of the SHG intensity of  $\text{NH}(\text{CH}_3)_3\text{SnX}_3$  (X=Cl, Br) measured on crystalline powder samples, compared with the KDP crystalline powder samples.

**Figure S5.** Powder and calculated X-ray diffraction patterns of  $\text{NH}(\text{CH}_3)_3\text{SnX}_3$  (X= Cl, Br) at different temperature.

**Figure S6.** Powder and calculated X-ray diffraction patterns of  $\text{NH}(\text{CH}_3)_3\text{SnX}_3$  (X= Cl, Br) when exposure to air for one month.

## Experimental Section

**Single-Crystal X-ray Diffraction and Powder X-ray diffraction.** Single-crystal X-ray diffraction measurements were executed on a *Bruker SMART APEX-II* diffractometer equipped with a CCD detector (graphite-monochromated Mo-K $\alpha$  radiation,  $\lambda = 0.71073 \text{ \AA}$ ) at different temperature. Data integration and refinements were carried out with *APEX2* software.<sup>[1]</sup> All the crystal structures were determined by direct methods and refined by full-matrix least-squares on  $F^2$  using the *SHELXTL* program package.<sup>[2]</sup> All the atom displacements in the crystal structure were fixed with anisotropic thermal parameters, and the refinements converged for  $F_o^2 > 2\sigma(F_o^2)$ . Symmetry analysis on the model using *PLATON* functions<sup>[3]</sup> of the *WinGX* platform<sup>[4]</sup> showed that no evident space group alternation was required. *ISOTROPY* software<sup>[5]</sup> was used to calculate the group-subgroup relationships and to find the correct space group. X-Ray powder diffraction (XRD) of polycrystalline material taken from the reaction solution was also collected using a *Bruker-AXS D8 ADVANCE* X-Ray diffractometer with Cu-K $\alpha_1$  radiation ( $\lambda = 1.54186 \text{ \AA}$ ) in the range of  $10^\circ$ - $90^\circ$  ( $2\theta$ ) with a time setting of 0.1 second per step and a step length of  $0.002^\circ$ .

**UV-vis diffuse reflectance spectra measurements.** UV-vis diffuse reflectance spectroscopy was carried out using a Shimadzu UV-3101PC spectrophotometer equipped with an integrating sphere over the spectral range 200-800 nm. A BaSO<sub>4</sub> plate was used as the standard (100% reflectance). The absorption spectrum was calculated from the reflectance spectrum using the Kubelka-Munk function:  $F(R) = \alpha/S = (1-R)^2/(2R)$ ,<sup>[6]</sup> where  $\alpha$  is the absorption coefficient,  $S$  is the scattering coefficient, and  $R$  is the reflectance.

**Second-Harmonic Generation (SHG) measurements.** The SHG effect of the NH(CH<sub>3</sub>)<sub>3</sub>SnX<sub>3</sub> (X= Cl, Br) powder samples was investigated using a Kurtz-Perry powder technique.<sup>[7]</sup> A pulsed Q-switched Nd: YAG laser was utilized to generate fundamental 1064 nm light with a pulse width of pulse width of 10 ns, pulse duration of 1 Hz and pulse energy of 10 mJ. Polycrystalline samples of NH(CH<sub>3</sub>)<sub>3</sub>SnX<sub>3</sub> (X= Cl, Br) and KH<sub>2</sub>PO<sub>4</sub> (KDP) were grinded and sieved to obtain distinct grain sizes ranges (40-60, 60-80, 125-175, 225-275, 275-325  $\mu\text{ m}$ ) in Figure S3. Microcrystalline KDP was served as the references. Besides, the temperature-dependent-SHG measurements were described elsewhere.<sup>17, 18</sup>

**Thermogravimetric analysis and Differential scanning calorimetry (DSC) measurements.** Differential scanning calorimetry (DSC) and thermogravimetric analysis (TGA) were carried out using a TGA/DSC1/1600HT analyzer (METTLER TOLEDO Instruments). The  $\text{NH}(\text{CH}_3)_3\text{SnX}_3$  (X= Cl, Br) powder samples were placed in a platinum crucible, and heated at a rate of  $10\text{ }^\circ\text{C min}^{-1}$  from room temperature to  $800\text{ }^\circ\text{C}$  under flowing  $\text{N}_2$  gas, respectively. Differential Scan calorimetry (DSC) measurements were performed on Polyma Instruments (DSC-200-F3 Maia). The  $\text{NH}(\text{CH}_3)_3\text{SnX}_3$  (X= Cl, Br) powder samples were placed in a platinum crucible, and heated at a rate of  $10\text{ }^\circ\text{C min}^{-1}$  from room temperature to  $150\text{ }^\circ\text{C}$ , and then cooled to  $-70\text{ }^\circ\text{C}$  in liquid  $\text{N}_2$  atmosphere and shifted back to room temperature under flowing  $\text{N}_2$  gas.

**X-ray photoelectron spectroscopy (XPS) measurements.** XPS measurements of the  $\text{NH}(\text{CH}_3)_3\text{SnX}_3$  (X= Cl, Br) on four samples with  $3 \times 3 \times 1\text{ mm}^3$  (newly synthesized and exposure to air one month) were performed on ESCALAB 250 (ThermoFisher SCIENTIFIC) instrument under vacuum atmosphere ( $1.7 \times 10^{-10}$  mbar).

**Band structure calculations.** The initial single crystal structures for  $\text{NH}(\text{CH}_3)_3\text{SnX}_3$  (X= Cl, Br) were obtained from single-crystal X-ray crystallographic data. All the calculations were performed using VASP 5.3.3 software<sup>[9-12]</sup> and then the atomic positions were optimized at PBE<sup>[13-14]</sup>/PAW<sup>[15-16]</sup> level with k points set as  $2 \times 2 \times 2$ . Based on the optimized structure, the band structure were calculated along the path G (0.0, 0.0, 0.0)-F (0.0, 0.5, 0.0)-Q (0.0, 0.5, 0.5)-Z (0.0, 0.0, 0.5)-G at the same the level of theory.

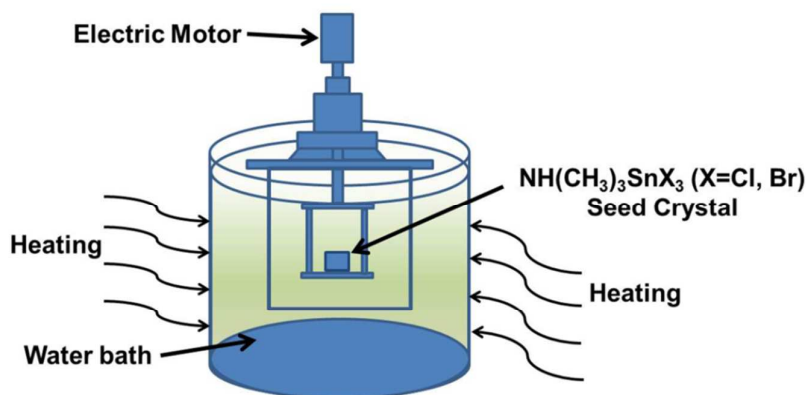

**Figure S1.** Schematic illustrations for the growth equipment of bulk NH(CH<sub>3</sub>)<sub>3</sub>SnX<sub>3</sub> (X= Cl, Br) single crystals.

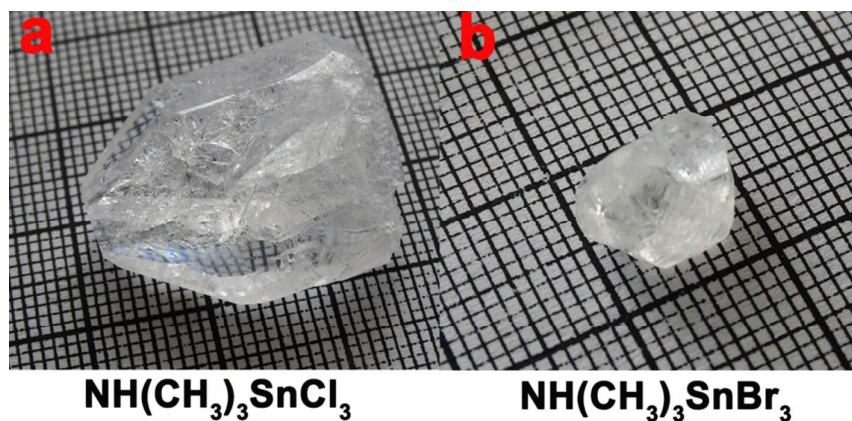

**Figure S2.** The photos of opaque NH(CH<sub>3</sub>)<sub>3</sub>SnX<sub>3</sub> (X=Cl, Br) single crystals.

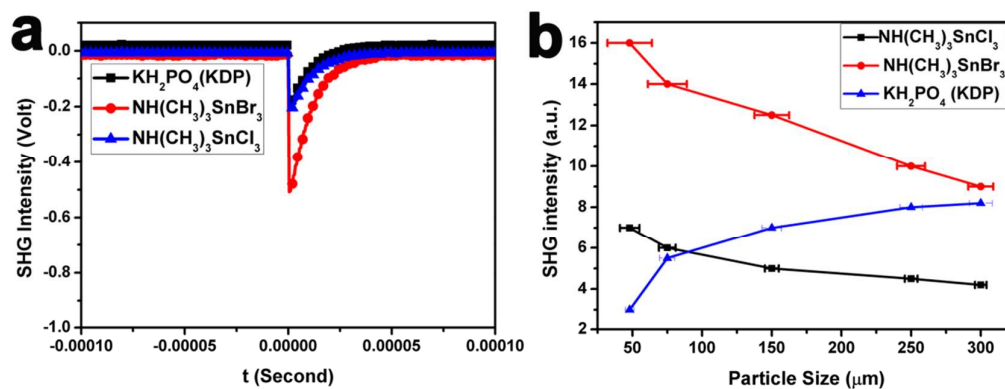

**Figure S3.** (a) The powder SHG signal of NH(CH<sub>3</sub>)<sub>3</sub>SnX<sub>3</sub> (X= Cl, Br) compared with KH<sub>2</sub>PO<sub>4</sub> (KDP) (particle size: 75-100 μ m). (b) Particle size dependence of SHG intensity for NH(CH<sub>3</sub>)<sub>3</sub>SnX<sub>3</sub> (X= Cl, Br) compared with KH<sub>2</sub>PO<sub>4</sub> (KDP).

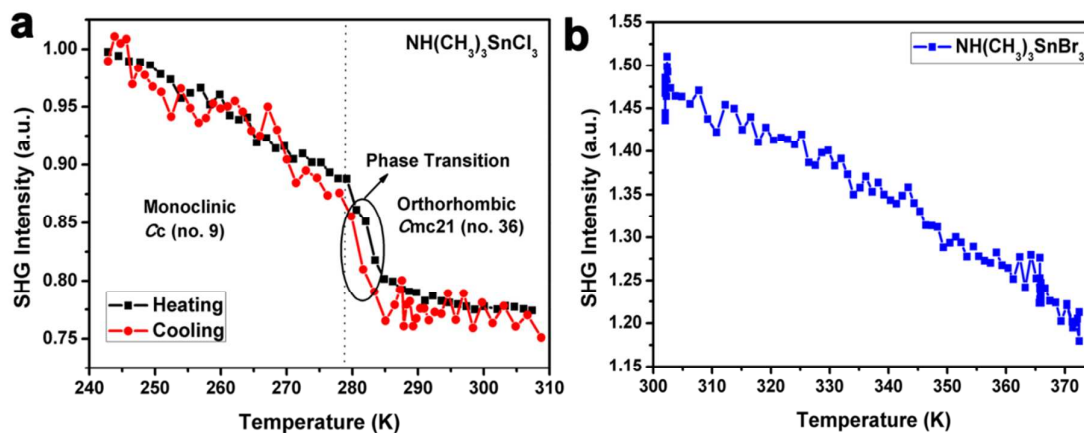

**Figure S4.** Temperature dependence of the SHG intensity of  $\text{NH}(\text{CH}_3)_3\text{SnX}_3$  ( $X=\text{Cl}, \text{Br}$ ) measured on crystalline powder samples, compared with the KDP crystalline powder samples.

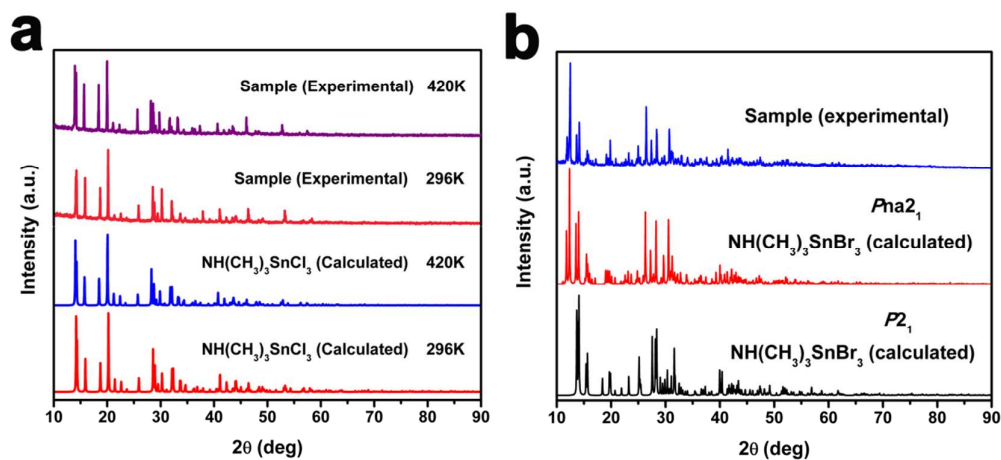

**Figure S5.** Powder and calculated X-ray diffraction patterns of  $\text{NH}(\text{CH}_3)_3\text{SnX}_3$  ( $X= \text{Cl}, \text{Br}$ ). (a) Powder and calculated X-ray diffraction patterns of  $\text{NH}(\text{CH}_3)_3\text{SnCl}_3$  at different temperature; (b) Powder and calculated X-ray diffraction patterns with space group  $Pna2_1$  by  $\text{NH}(\text{CH}_3)_3\text{SnBr}_3$  single crystal measurements, and calculated X-ray diffraction pattern with space group  $P2_1$  reported by Thiele, et al.<sup>[8]</sup>

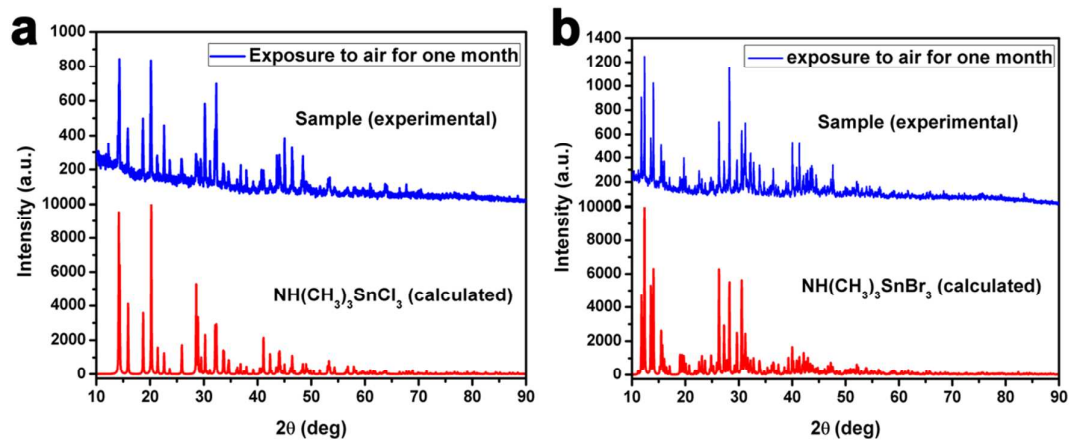

**Figure S6.** Powder and calculated X-ray diffraction patterns of  $\text{NH}(\text{CH}_3)_3\text{SnX}_3$  ( $\text{X} = \text{Cl}, \text{Br}$ ) when exposure to air for one month.

## References

- [1] Bruker, *APEX2, Bruker Analytical X-ray Instruments*, Inc., Madison, Wisconsin, USA, **2005**.
- [2] Sheldrick, G. M. *SHELXTL, version 6.12*, Bruker Analytical X-ray Instruments, Inc., Madison, WI, **2001**.
- [3] Spek, A. L. *J. Appl. Crystallogr.*, **2003**, 36, 7-13.
- [4] Farrugia, L. J. *J. Appl. Cryst.* **1999**, 32, 837-838.
- [5] Stokes H. T.; Hatch, D. M.; Campbell, B. J. *ISOTROPY*; Department of Physics and Astronomy, Brigham Young University: Provo, Utah, **2007**; [stokes.byu.edu/isotropy.html](http://stokes.byu.edu/isotropy.html).
- [6] Wendlandt, W. M.; Hecht, H. G. *Reflectance Spectroscopy*, Interscience, New York, **1966**, p. 62.
- [7] Kurtz, S. K. and Perry, T. T. *J. Appl. Phys.* **1968**, 39, 3798-3813.
- [8] Thiele, G.; Seer, B. R. *Z. Kristallogr.*, **1996**, 211, 46.
- [9] Kresse, G. and Hafner, J. *Phys. Rev. B*, **1993**, 47, 558-561.
- [10] Kresse G. and Hafner, J. *Phys. Rev. B*, **1994**, 49, 14251-14269.
- [11] Kresse G. and Furthmüller, J. *Comput. Mat. Sci.*, **1996**, 6, 15-50
- [12] Kresse G. and Furthmüller, J. *Phys. Rev. B*, **1996**, 54, 11169-11186.
- [13] Perdew, J.; P. Burke, K. and Ernzerhof, M. *Phys. Rev. Lett.*, **1996**, 77, 3865-3868.
- [14] Perdew, J.; P. Burke, K. and Ernzerhof, M. *Phys. Rev. Lett.*, **1997**, 78, 1396.
- [15] Blochl, P. E. *Phys. Rev. B*, **1994**, 50, 17953-17979.
- [16] Kresse, G. and Joubert, D. *Phys. Rev. B*, **1999**, 59, 1758-1775.
- [17] Ye, H. Y. et al. *J. Am. Chem. Soc.*, **2014**, 136, 10033-10040.
- [18] Zhang, Y. et al. *Angew. Chem. Int. Ed.*, **2014**, 53, 5064-5068.
